# Supplementary material for: Transcriptional regulatory network controlling the ontogeny of hematopoietic stem cells
Source: PubMed Central journal article supplement (PMC7328518; doi:10.1101/gad.338202.120), 2020-07-01

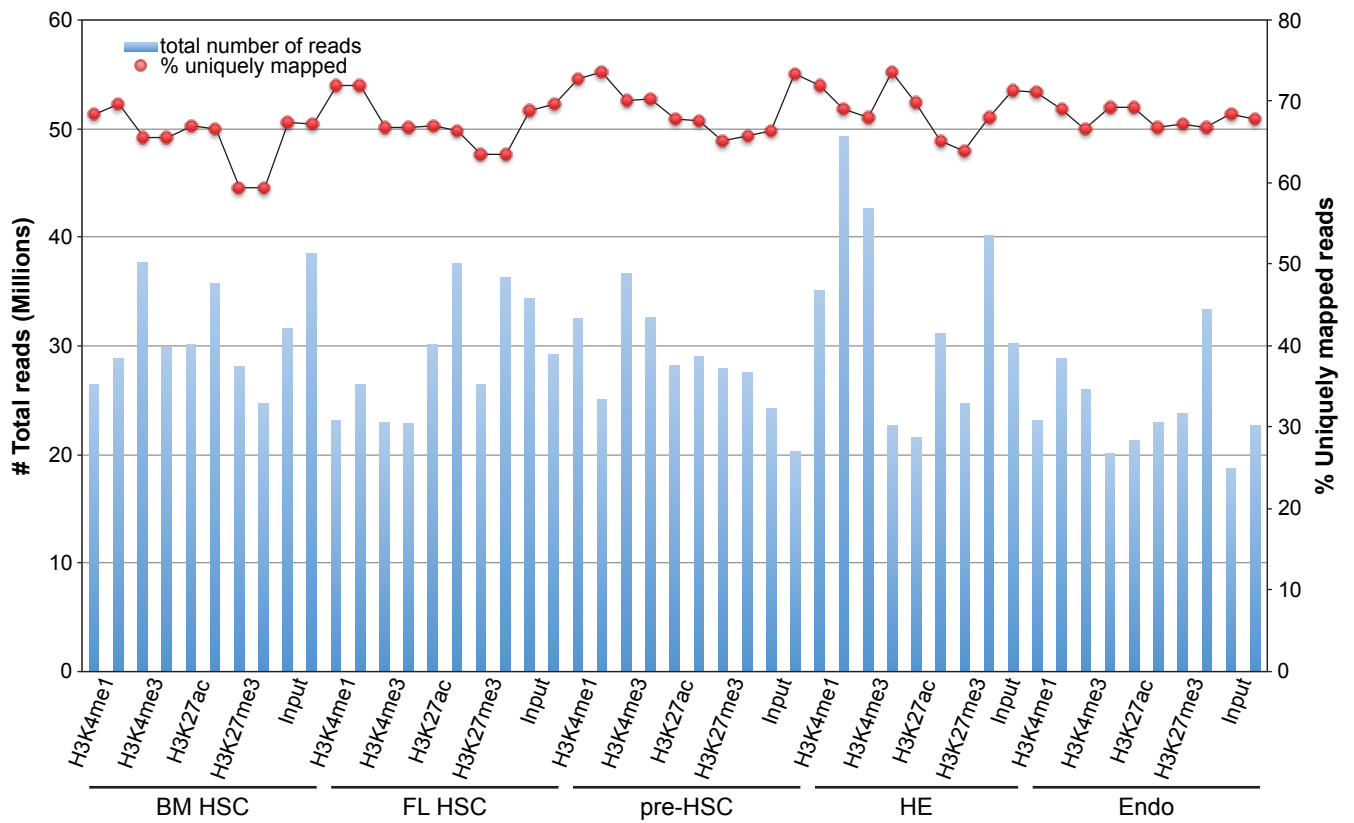

Supplement: supp_gad.338202.120_Supplemental_Fig_S4.pdf [file supp_gad.338202.120_Supplemental_Fig_S4.pdf]
