# Supplementary material for: Transcriptional regulatory network controlling the ontogeny of hematopoietic stem cells
Source: PubMed Central journal article supplement (PMC7328518; doi:10.1101/gad.338202.120), 2020-07-01

*Runx1*

*c-myb*

24 hpf

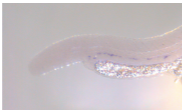

27 hpf

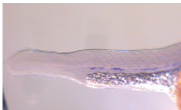

27 hpf

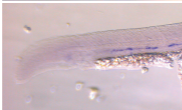

30 hpf

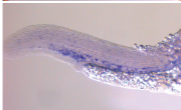

30 hpf

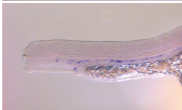

33 hpf

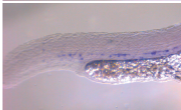

33 hpf

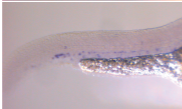

36 hpf

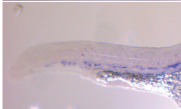

Supplement: supp_gad.338202.120_Supplemental_Fig_S10.pdf [file supp_gad.338202.120_Supplemental_Fig_S10.pdf]
